# Supplementary material
Source: PubMed Central journal article supplement (PMC3748347)
Supplement: mmc1.pdf [file mmc1.pdf]

## Supplemental Information

### Structures of CD200/CD200 Receptor Family and Implications for Topology, Regulation, and Evolution

Deborah Hatherley, Susan M. Lea, Steven Johnson, and A. Neil Barclay

#### Inventory of Supplemental Information

**Figure 1.** This describes the purified proteins and the extent of the removal of the carbohydrate that is a major part of the glycoprotein, Related to Experimental Procedures

**Figure 2.** This indicates two points – one an indication of the fit of the electron density data and secondly analysis of the density around the ‘exposed Cys’ as discussed in the text; these are the raw data, Related to Figure 2

**Figure 3.** The movement in CD200R on binding CD200 is discussed in the text. This figure makes it much easier to visualize what is happening, Related to Figure 3

**Figure 4.** This is the alignment of the activating members of the CD200R family and allows discussion of the changes that lead to no binding, Related to Figure 6

**Table 1.** This contains the raw data on the mutagenesis. The results can be illustrated in the figures in the text but these data show the detailed quantitative analysis that has gone into working out the contributions of residues to the gain of function, Related to Figure 5

## Supplementary Figures

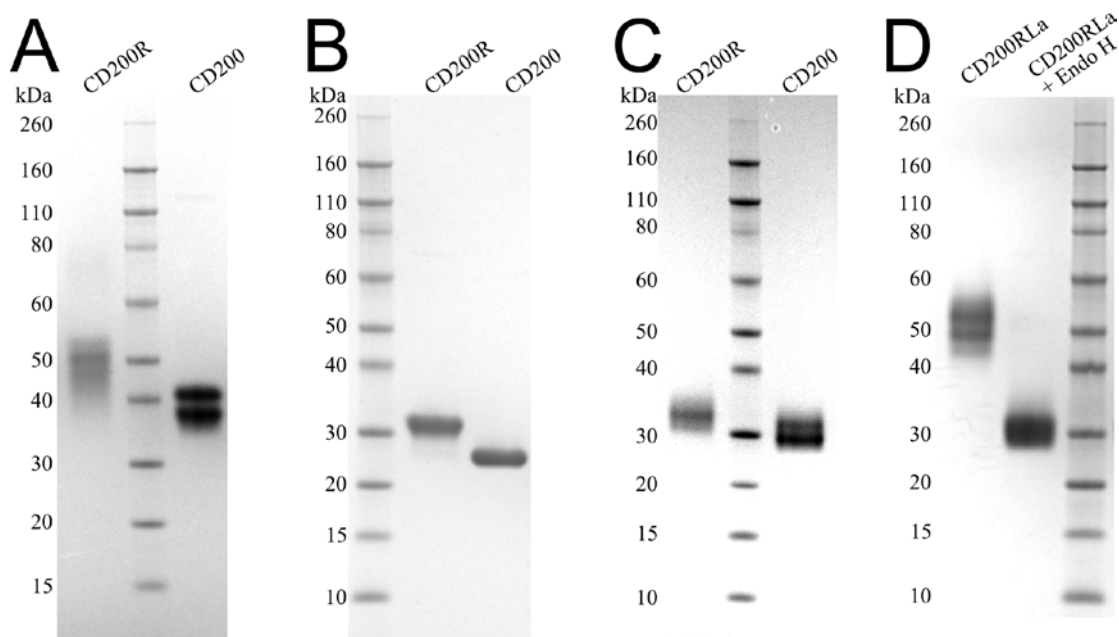

Figure S1. Purified proteins used for X-ray crystallography. SDS PAGE analysis shows deglycosylation of recombinant proteins. (A) Ni-NTA purified CD200R and CD200 produced by CHO Lec3.2.8.1 cells. (B) Deglycosylated CD200R and CD200 used for crystallisation are shown. Proteins were deglycosylated using endo H<sub>f</sub>, passed through a concanavalin A Sepharose™ column and gel filtrated. (C) Endo H<sub>f</sub> resistant glycoforms of CD200 and CD200R were eluted from a concanavalin sepharose column, gel filtrated and used for ligand binding experiments using a BIAcore. (D) Glycosylated CD200RLa produced in CHO Lec3.2.8.1 cells (first lane) and deglycosylated CD200RLa used for crystallisation (second lane) are shown.

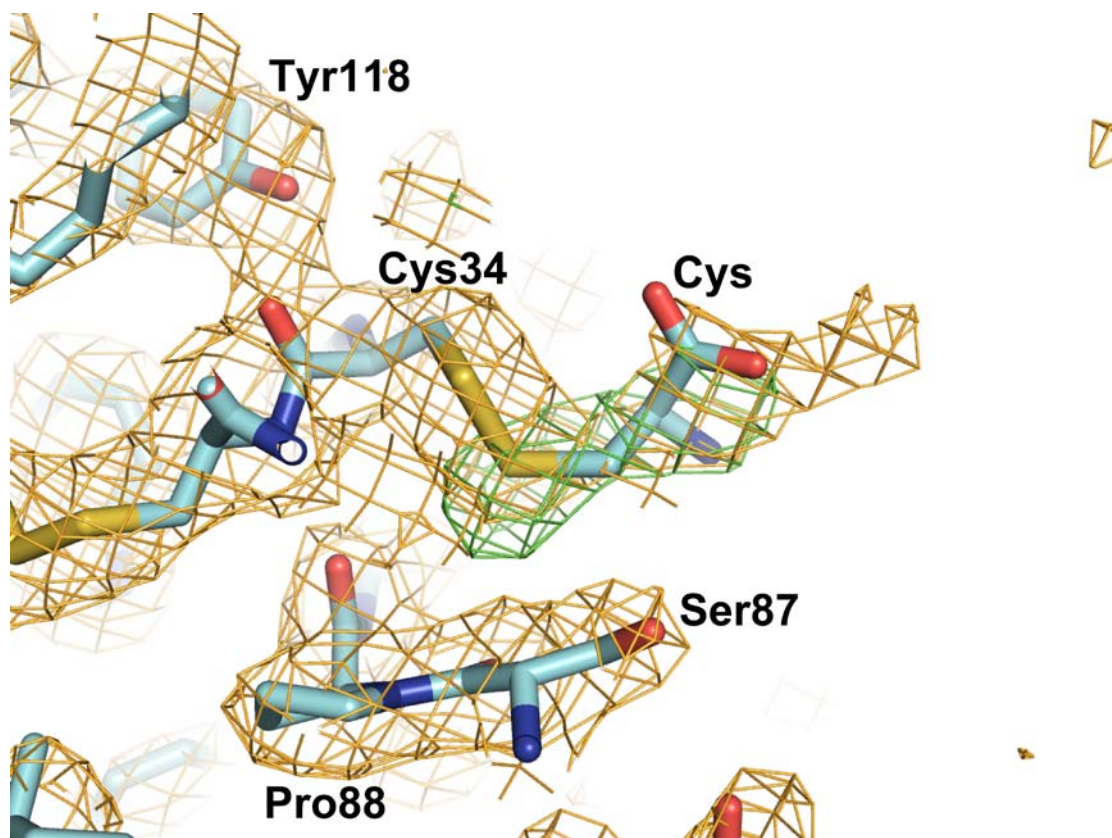

Figure S2, related to Figure 2. Electron density showing the extra density attached to Cys34 in copy A of mCD200RLa. 2Fo-Fc (orange, 1sigma) and Fo-Fc (green, 3sigma) maps were calculated before anything was modelled in the density. Also shown are the final refined coordinates with a Cys residue bonded to Cys34.

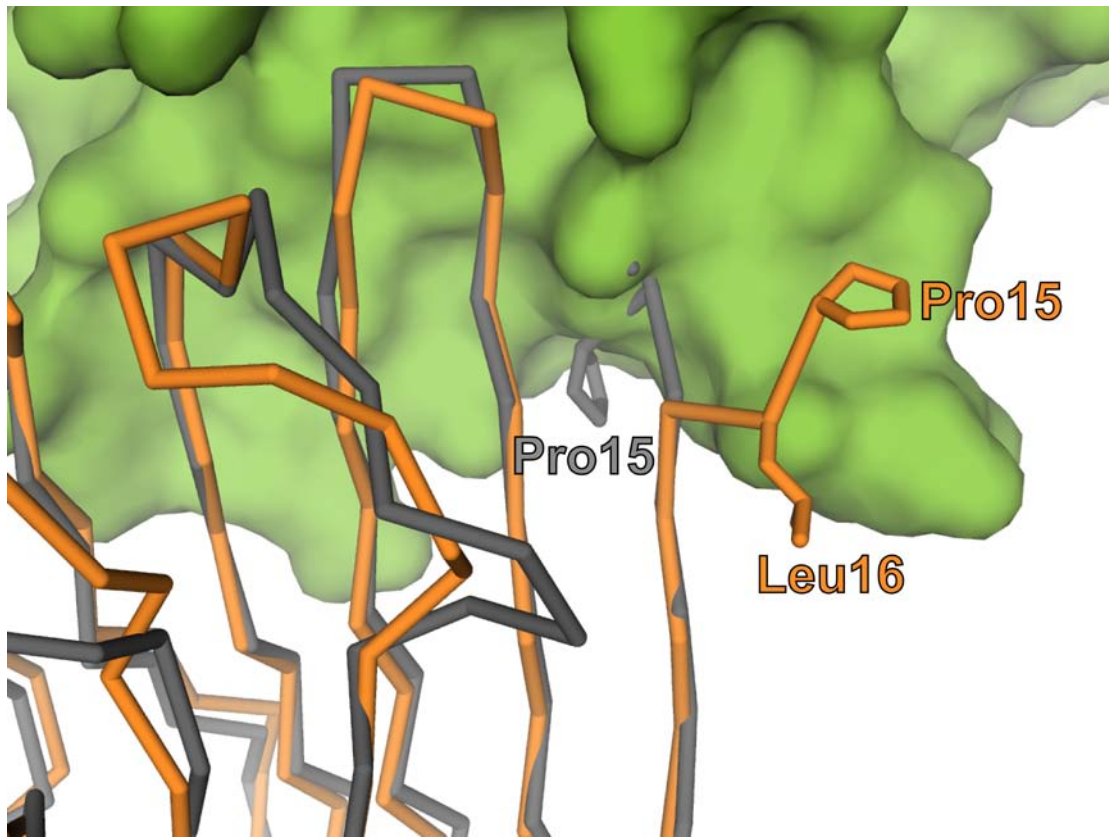

Figure S3, related to Figure 3. CD200 (green surface) shown complexed with CD200R (orange ribbon) and a virtual complex with free CD200R (grey ribbon). Pro15 and Leu16 move from the GFC face to the BED face due to an approximately 120 degree rotation of the psi angle of Thr17, thereby exposing the full CD200 binding site.

```

mCD200R      MFCFWRTS...ADAVLLIIGVVFVAGSS...CTDKNQTTQNNSSSPLT
mCD200RLa   MHALGRIP...TLTLLIFINIFVSGSS...CTDENQTIQNDSSSSLT
mCD200RLb   MHALGRRL...ALMLLIFITILVPESSSSVKGREEIPPDDSFPFSDDNIFPDGVGVTMEI
mCD200RLc   MHALGRTP...ALTLLIFINIFVS...
mCD200RLe   MHALGRTP...ALTLLIFINIFVSGSR...CTDKNQTIQNDSSSPLT
hCD200R     MLCFWRTANLGLLILITFLVAASSSL...CMDEKQITQNYS.KVLA
hCD200RLa   MSAPR...LLISITIMVSASSSS...CMGGKQMTQNYS.TIFA

```

```

      A       B       C       C'       C''
      20      30      40      50      60      70
mCD200R  QVNTTVSVQIGTKALLCCFSIPLTKAVLITWIKLRGLPSCTIAYKVDTK.TNETSCLGR
mCD200RLa QVNTTMSVQMDKKALLCCFSSPLINAVLITWIKHRHLPSCTIAYNLDK.TNETSCLGR
mCD200RLb EIITPVSVQIGIKAQLFCHPSPSKEATLRIWEITPRDWPSCRLYRAELQQISKKICTER
mCD200RLc .VYTIVSVQMGTKARLCCRSIPLTKAVLITWIKPRGQPSCIMAYKVETK.ETNETSCLGR
mCD200RLe QVNTTVSVQIGTKALLCCFSIPLTKAVLITWIKLRDLPSCTILYKVDTK.TIETSCLDR
hCD200R   EVNTSWPVKMATNAVLCCPPIALRNLIIITWEILRGQPSCTKAYKKETNETKETNCTDE
hCD200RLa EGNISQPVLMDINAVLCCPPIALRNLIIITWEILRGQPSCTKAYKKETNETKETNCTVE

```

```

      D       E       F       G
      80      90      100     110     120
mCD200R  NITWASTPDHSPELOISAVTLQHEGTYTCETVPEPECNFEKNYDLQVLV
mCD200RLa NITWASTPDHSPELOISAVALQHEGTYTCEIVTPEGNLEKVYDLQVLV
mCD200RLb GTTRVPAHHQSSDLPIKSMALKHDCHVSCRIETTDGIFQERHSIQV...
mCD200RLc NITWASTPDHIPDLOISAVALQHECNYLCEITPEPECNFHKVYDLQVLV
mCD200RLe NITWASTPDHSPELOISAVTLQHEGTYTCETVPEPECNFGRVYDLQVLV
hCD200R   RITWVSRPDQNSDLOIRTVAITHDGYRCIMVTPDGNFHRGYHLQVLV
hCD200RLa RITWVSRPDQNSDLOIRPVDTTHDCYRGIVVTPDGNFHRGYHLQVLV

```

Figure S4, related to Figure 6. Sequence alignment of the leader and V-like domain of the CD200R family. Amino acid secondary structure is based on the mouse CD200R crystal structure with beta strands represented by arrows. Conserved residues are highlighted in blue and residues identical in five or more sequences are in blue type. NH<sub>2</sub>-terminal residues determined by protein sequencing are highlighted in cyan. mCD200R residues at the CD200 / CD200R interface are highlighted in orange. The residues of mCD200RLa that upon mutation resulted in binding to CD200 (with a similar affinity as mCD200R) are highlighted in green. Accession numbers of the sequences are NP\_067300 (mCD200R), NP\_997127 (mCD200RLa), NP\_001121604 (mCD200RLb), Q6XJV6 (mCD200RLc), Q8BTP3 (mCD200RLe), NP\_740750 (hCD200R), and NP\_001008784 (hCD200RLa).

Table S1, related to Figure 5. The ability of CD200 mutants to bind CD200R compared to wild type CD200 determined by BIAcore analysis as in Figure 5. The experiment was repeated twice and the average result is given.

|                  | CD200     | CD200R protein binding (%) |
|------------------|-----------|----------------------------|
| Residue location | Wild type | 100                        |
| BC loop          | L30K      | 3                          |
| C strand         | I31E      | 0                          |
| C' strand        | N44D      | 1                          |
| C' strand        | N44A      | 2                          |
| F strand         | L92A      | 11                         |
| F strand         | N94K      | 1                          |
| FG loop          | F96D      | 1                          |
| FG loop          | F96A      | 3                          |
| FG loop          | K100E     | 2                          |
| A strand         | Q7K       | 102                        |
| B strand         | S18D      | 95                         |
| BC loop          | Q27K      | 145                        |
